# Supplementary material
Source: PubMed Central journal article supplement (PMC5142072)
Supplement: CJN.05920616SupplementaryData.pdf [file CJN.05920616SupplementaryData.pdf]

**Vancomycin and the risk of acute kidney injury: A systematic review and meta-analysis**  
Abhisekh Sinha Ray, Ammar Haikal, Kassem A. Hammoud and Alan S.L. Yu

**SUPPLEMENTAL MATERIAL**

---

**Supplemental Table 1.** Evidence summary and GRADE analysis\*

| <b>Quantity and type of evidence</b> | <b>Points</b>   |
|--------------------------------------|-----------------|
| Starting level of evidence           | High            |
| Risk of bias                         | 0               |
| Indirectness                         | -1 <sup>†</sup> |
| Inconsistency                        | 0               |
| Imprecision                          | 0               |
| Publication bias                     | 0               |
| Large magnitude                      | 0               |
| Confounders                          | 0               |
| Dose-response                        | 0               |
| Final level of evidence strength     | Moderate        |

\*Meta-analysis of 7 RCTs (4 with uncertain risk of bias): RR 2.45 [CI, 1.69 - 3.55], and qualitative analysis of 6 cohort studies (1 at low risk of bias): RR 1.63

<sup>†</sup>The preponderance of evidence was judged to be indirect because 12 of 13 studies compared vancomycin specifically to linezolid. Thus, the majority of studies addressed a restricted version of the broader question of whether vancomycin *per se* increases kidney injury.
